# Supplementary material for: New Insights on the Feature and Function of Tail Tubular Protein B and Tail Fiber Protein of the Lytic Bacteriophage φYeO3-12 Specific for Yersinia enterocolitica Serotype O:3
Source: PubMed Central journal article supplement (PMC7582827; doi:10.3390/molecules25194392), 2020-09-24
Supplement: molecules-25-04392-s001.pdf [file molecules-25-04392-s001.pdf]

**New insights on the feature and function of Tail Tubular Protein B and Tail Fiber Protein of the Lytic Bacteriophage  $\phi$ YeO3-12 specific for *Yersinia enterocolitica* Serotype O:3**

Anna Pyra<sup>1\*</sup>, Karolina Filik<sup>2</sup>, Bożena Szermer-Olearnik<sup>2</sup>, Anna Czarny<sup>2</sup>, Ewa Brzozowska<sup>2\*\*</sup>

<sup>1</sup> University of Wrocław, Faculty of Chemistry, 14 F. Joliot-Curie St, Wrocław, 50383, Poland

<sup>2</sup> Hirszfeld Institute of Immunology and Experimental Therapy, Polish Academy of Sciences, 12 R. Weigl St, Wrocław, 53114, Poland

Correspondence to:

\* anna.pyra@chem.uni.wroc.pl

\*\* ewa.brzozowska@hirszfeld.pl

BLAST amino acid sequence analysis [28] showing similarity of TTPBgp12 to other TPs.

| Phage Tail Protein (TP)       | Phage of                                                                                               | % of amino acid sequence identity of TP |
|-------------------------------|--------------------------------------------------------------------------------------------------------|-----------------------------------------|
| Tail Tubular Protein B (TTPB) | <i>Yersinia, Escherichia, Salmonella, Citrobacter, Serratia, Klebsiella, Leclercia, Enterobacteria</i> | 97-99                                   |
|                               | <i>Salmonella, Serratia, Escherichia, Enterobacteria, Erwinia, Yersinia, Pectobacterium</i>            | 65-70                                   |
|                               | <i>Pectobacterium, Erwinia, Pantoea, Yersinia, Escherichia, Enterobacteria, Salmonella, Klebsiella</i> | 62-65                                   |
| Tail Fiber Protein (TFP)      | <i>Enterobacter</i>                                                                                    | 99-100                                  |
|                               | <i>Escherichia, Stenotrophomonas, Klebsiella</i>                                                       | 62-67                                   |

BLAST amino acid sequence analysis [29] showing similarity of TFPgp17 to other phage TFPs.

| Phage of                                                                                                                                  | % of amino acid sequence identity of TFP to TFPgp17 |
|-------------------------------------------------------------------------------------------------------------------------------------------|-----------------------------------------------------|
| <i>Enterobacter, Yersinia, Serratia, Citrobacter, Shigella, and Escherichia</i>                                                           | 99-100                                              |
| <i>Dickeya</i>                                                                                                                            | 92                                                  |
| <i>Yersinia</i>                                                                                                                           | 81-84                                               |
| <i>Pseudomonas and Klebsiella</i>                                                                                                         | 76 -78                                              |
| <i>Dickeya</i>                                                                                                                            | 68                                                  |
| <i>Klebsiella, Escherichia, Stenotrophomonas and Pseudomonas</i>                                                                          | 51-55                                               |
| <i>Leclercia, Escherichia, Pectobacterium, Erwinia, Enterobacteria, Yersinia, Xylella, Klebsiella, Serratia, Kluyvera and Pseudomonas</i> | 47-48                                               |
| <i>Pseudomonas, Serratia, Citrobacter and Salmonella</i>                                                                                  | 43-46                                               |
| <i>Pseudomonas</i>                                                                                                                        | 24                                                  |

The BLAST amino acid sequence alignment scheme [28] showing similarity of TFPgp17 and TFP of *Enterobacteria* phage T7 (T7\_TFP), TFP of *Enterobacteria* phage T3 (T3\_TFP) of tail spike protein of *Enterobacteria* phage K1F (K1F\_TSP), L-shaped TFP of *Escherichia* phage T5 (T5\_TFP), side TFP of prophage K12 (K12\_TFP) and TFP of *Enterobacteria* phage lambda (L\_TFP).

### Distribution of the top Blast Hits on 6 sequences

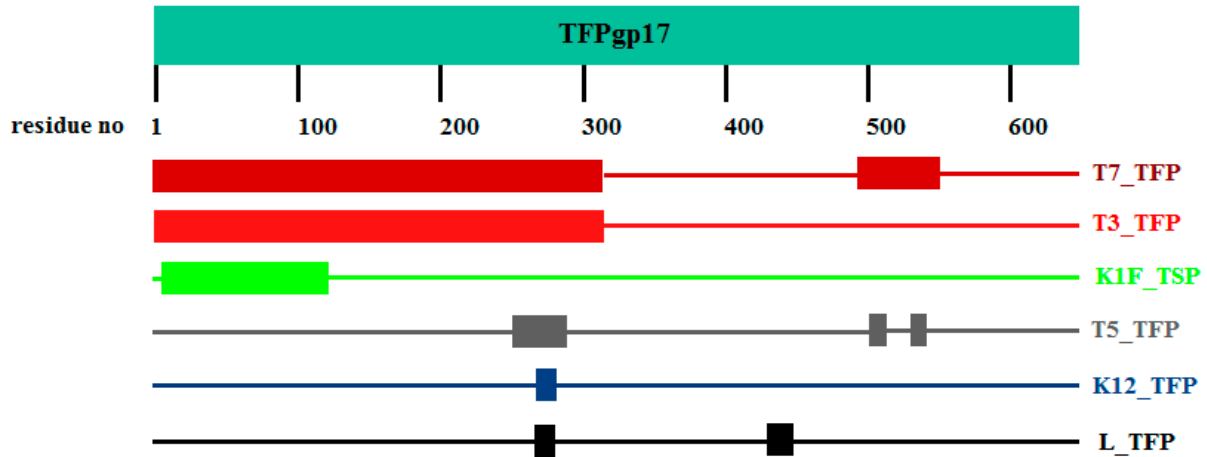

Sequence alignment of TTPBgp12 and T7\_TTPgp12 from bacteriophage T7 (PDB code: 6r21) [13] using The Clustal Omega tool [24]. Identities between TTPBgp12 and T7\_TTPgp12 are shown in red.

```

TTPBgp12      MALISQSIKLNKGGISQQPDILRFAEQGSVQINGWSSESEGLQKRPPMIHLKTLGPAGYV      60
T7_TTPgp12    MALISQSIKLNKGGISQQPDILRYPDQGSRQVNGWSSETEGLQKRPPLVFLNLTLDNGAL      60

TTPBgp12      GAQPYVHLINRDEFQYFVFTGEDIKVFDLDGKEYQVR--GDRSYVRANPREDLRMIT      118
T7_TTPgp12    GQAPYIHLINRDEHEQYAVFTGSGIRVFDLSGNEKQVRYPNGSNYIKTANPRNDRMVT      120

TTPBgp12      VADYTFVTNRKVVVQSNLQSVNLFQFQDQGDALINVRGGQYGRRLSIEFNGAERAQVLP      178
T7_TTPgp12    VADYTFIVNRNVVAQKNTKSVNLFNPNFNQDGLINVRGGQYGRELIVHINGKDVAKYKIP      180

TTPBgp12      DGSQFAHVNEVDGQAIAEKLAQLRNINLGNPNNDQDFNKWRFNVGPGFIHILAPNNDNVW      238
T7_TTPgp12    DGSQPEHVNTDAQWLAEELAKQMRNTNL-----SDWTVNVQGGFIHVVTAPSGQQID      231

TTPBgp12      GLQTKDGYADQLINPVTHYTQSFQKLPINAPDGYIVKIVGDTSKTADQYVRFDLNRKVV      298
T7_TTPgp12    SFTTKDGYADQLINPVTHYAQSFKLPFNAPNGYMKIVGDASKSADQYVRYDAERKVV      291

TTPBgp12      VETIGWNTRTHLYYHTMPWALVRASDGNDFKVLWEGARTVGGDDTNPYPSFTGQTINDI      358
T7_TTPgp12    TETLWNTEDQVLWETMPHALVRAADGNDFKVLWESPKSCGDVDNPFWPSFVGSINDV      351

TTPBgp12      FFFRNRLGFLSGENIILSRTSKYFNFPASVSNYSDDDPIDVAVSHNRVSTLKYAVPFSE      418
T7_TTPgp12    FFFRNRLGFLSGENIILSRTAKYFNFPASIANLSDDDPIDVAVSTNRIAILKYAVPFSE      411

TTPBgp12      ELLLWSDQAQFVLTAAGILSSRSVELNLTQFDVQDRARPHGVGRNVYFASPRASFTSIN      478
T7_TTPgp12    ELLIWSDEAQFVLTAAGTLTSKSVELNLTQFDVQDRARPHGIGRNVYFASPRASFTSIH      471

TTPBgp12      RYYAVQDVSSVKNAEDMTAHVPNYIPNGVFSISGTTAENFAAILTSGAPNRVYIYKFLYI      538
T7_TTPgp12    RYYAVQDVSSVKNAEDI TSHVPNYIPNGVFSICGSGTENFCSVLSHGDP SKIFMYKFLYL      531

TTPBgp12      DEEIRQQSWSHWDFGDNVTVFAAQVINSTMVLMGNEHAVVMGRHLHFTKN SIDIPGEPYR      598
T7_TTPgp12    NEE LRQQSWSHWDFGENVQVLAQCQSSSDMVVILRNEFNFTFLARISFTKNAIDLQGEPYR      591

TTPBgp12      LYIDAKRKYTIPTAGTYNDDTYQTSISLATIYGMNFTKGRVSVVFPDGKIEVDQFINGWS      658
T7_TTPgp12    AFMDMKIRYTIPTSGTYNDDTFTSIHIPTIYGANFGRGKITVLEPDGKITVFEQETAGWN      651

TTPBgp12      SDPVLRLDGNQEGQVVIYGFNIPFTYTFPSKFLIKKTAEDGSTATEDIGRLQLRRRAWVNYE      718
T7_TTPgp12    SDPVLRLSGNLEGRMVYIYGFNINPVYEFPSKFLIKQTADDGSTATEDIGRLQLRRRAWVNYE      711

TTPBgp12      DSGAFTIRVNNLSREFIYTMAGARLGSNLRVGRSNIGTGQYRFPVVGNAQTNLVITIEDS      778
T7_TTPgp12    NSGTFDIYVENQSSNWKYTMAGARLGSNLRVGRSNIGTGQYRFPVVGNAKFNFTVYILSD      771

TTPBgp12      ASTPLNIIGCGWEGNYLRRSSGI      801
T7_TTPgp12    ETPLNIIGCGWEGNYLRRSSGI      794

```

The results of HHPred analysis of TFPgp17 [31].

| No | Homologous template protein            | Source                                  | PDB code | % of probability | Amino acid residues of template protein | Amino acid residues of TFPgp17 | The length of polypeptide chain |
|----|----------------------------------------|-----------------------------------------|----------|------------------|-----------------------------------------|--------------------------------|---------------------------------|
| 1  | Endo-N-acetylneuraminidase (chaperone) | <i>Enterobacteria</i> phage K1F         | 3GW6     | 99.4             | 10-275                                  | 419-643                        | 208                             |
| 2  | Receptor recognition protein           | <i>Salmonella</i> phage vB_SenMS16      | 6F45     | 99.3             | 78-193                                  | 524-645                        | 113                             |
| 3  | L-shaped tail fiber protein            | <i>Enterobacteria</i> phage T5          | 4UW8     | 99.2             | 232-426                                 | 412-645                        | 156                             |
| 4  | Neck appendage protein (chaperone)     | <i>Bacillus</i> phage GA-1              | 3GUD     | 99.1             | 1-123                                   | 539-641                        | 93                              |
| 5  | phiAB6 tailspike                       | unidentified phage                      | 5JSD     | 99.1             | 21-179                                  | 2-188                          | 156                             |
| 6  | Tail spike protein                     | <i>Acinetobacter</i> phage vB_AbaP_AS12 | 6EU4     | 98.9             | 569-716                                 | 500-638                        | 125                             |

Multiple sequence alignment of TFPgp17 and TFP from phage T7 (T7\_TFP, UniProt code: P03748), TFP from phage T3 (T3\_TFP, UniProt code: P10308), tail spike protein from phage K1F (K1F\_TSP, UniProt code: Q04830). Identities between TFPgp17 and all other selected proteins are shown in dark blue; those between TFPgp17, T7\_TFP and T3\_TFP are shown in red; those between TFPgp17, T7\_TFP and K1F\_TSP are shown in grey; those between TFPgp17 and T7\_TFP are shown in turquoise; those between TFPgp17 and T3\_TFP are shown in cyan and those between TFPgp17 and K1F\_TSP are shown in orange.

```

TFPgp17  MATTIKIVMTYPLDGGSTDFNIPFEYLARKFVVRTLIGVDR----KELILNQOYRFATKT 56
T7_TFP   MANVIKIVLTYQLDGSNROFNIPFEYLARKFVVRTLIGVDR----KVLITINTDYRFATRT 56
T3_TFP   MANVIKIVLTYQLDGSNROFNIPFEYLARKFVVRTLIGVDR----KVLISINADYRFATRT 56
K1F_TSP  MS-TI---T-QFFSGNTQYRIEFDYLARTFVVVTLVMSNSPTLNRVLEVGROYRFLNPT 54

TFPgp17  TISTTRALGPFADGYTLIEIRRFSAIDRLVDFDGGILRAYDLNISQVQTLRVAAEARDL 116
T7_TFP   TISLTKANGPFADGYTTIELRRVTSITDRLVDFDGGILRAYDLNVAIQTMRVAAEARDL 116
T3_TFP   TISLTKANGPFADGYTTIELRRVTSITDQLVDFDGGILRAYDLNVAIQTMRVAAEARDL 116
K1F_TSP  MIEML---VDQSGFDIVRHKQF-CIDLVVDFRNGSVLTAEDLTTAEELCAIMIAKEGPDQ 110

TFPgp17  TADTIGVNDGHLN-----ARGRRIWNVADAQVVGDAINLQGI-----QRGNDSA 161
T7_TFP   TTDTIGVNDGHLN-----ARGRRIWNLANAVDDRDAVFFGQL-----KIDNQNS 161
T3_TFP   TADTIGVNDGHLN-----ARGRRIWNLANAVDDRDAVFFGQL-----KIDNQNS 161
K1F_TSP  TVDLAKEYADAAGSSAGNANDSEEARRIAESIRAA----GLIGYIETRRSFEKGYNVTT 165

TFPgp17  LNSANNKQEQADPATAANANDANNSANASASASASASAEALAKMWTSD-TVVEQDIESS 220
T7_TFP   WQARNEALQFNEAETFRQAEGFKNE-----SSTNATNKQRDET-KGYRDEAK-- 211
T3_TFP   WQARNEALQFNEAETFRQAETVFKNE-----SGTNATNKQRDEA-NGSRDEAE-- 211
K1F_TSP  WSE---VLLMEEDGYYRMDGTLFKNVFAGSTPETSQIGG-LGAWVSVGDAAALRQGISN- 220

TFPgp17  RTYALHSLYRNETKDSDRAAVSETHAK--ASECGAANSAAAKVSETAKA----- 271
T7_TFP   -RFONTAGQYATSAGNSAS-----AAH--QSEVNAENSATASANSALAEQ----- 254
T3_TFP   -QFONTAGQYATSAGNSAT-----TAT--QSEVNAENSATADANSALAEQ----- 254
K1F_TSP  ---PEGAILYFELHEAR---NLDKMDARGNGAKGDGVTDDTAAITSAINDTFVGGKING 273

TFPgp17  -SEERAITEASKLQGNDFAAAEISVTQNDVQKQAVVSSPGNITG--GGLVSTGAASIQK 328
T7_TFP   -QADRAREADKLEWYNGLAGAIDKVDGTVYKNGNIEANGRLYMTNDFDC-GQYQQFF 312
T3_TFP   -HADRLLEADKLGIFNGLAGRIDKGDGTVYKNGGIEANGRLYLTSDGDC-GQYQQFF 312
K1F_TSP  NGNTYKVTSLFDISRFINTRFVYERIPQQLFYASEEFVQGLFKITDTPY----- 324

TFPgp17  GALVGEDLIVGRDITAKQDMYSQR-----NIAVAGVYTAQGGIEQTLATNIYK 377
T7_TFP   CGVTHRYSVAGWGDENGCMKVVQRREWPTAIGGNIQLVNGQIITQCGMHTQGLK---- 367
T3_TFP   CGSACRYSVAGWGIKAWLKHVERRERTTAIVDNIQLVNGHIIAQGGDMHTGLK---- 367
K1F_TSP  -----YNANPQDKA-----FVYENVI----- 340

TFPgp17  LYRLHINNPQHVGRQGLHIGNESGSGESNFTINRAGSGGFVFRVNAENSVEVGRV 437
T7_TFP   -----LQNGHVQLLESAADKAIYILSKDGNRNNWYIGRSDN-----NN 406
T3_TFP   -----LQNGHALYLESAADKAIYILSKDGNRNNWYIGRSDN-----NN 406
K1F_TSP  -IAPINGSD---RNGVSRHVSQVKSQDDGQVWTFP-----EWLITDLRFDY--FTVNY 387

TFPgp17  DITGGQVIY-----ANNLQURSARIE----- 459
T7_TFP   DCTFHSHYH-----GTLTLKQDYAVV----- 428
T3_TFP   DCTFHSHYVY-----GTNLTLPDYAVV----- 428
K1F_TSP  HCSMSQVCRNELFAMIESTRLANQALTNCALNDRPHMSRLHLTGQITKAANQRYATIKVF 447

TFPgp17  GNNIVGQ-----NLYAGMSTMFEGNGLTGGINA---- 490
T7_TFP   NKH-----FHVQAVVAIDGNIQGT----- 449
T3_TFP   NGR-----FHVQAVVAIDGNIQGT----- 449
K1F_TSP  DRGLFVCDFVNFNSAVTGVSGDMTVATVIDKDNFTVLTFFNQTSDLNNAIGQWHDGTSF 507

TFPgp17  ---QNGNLMSGLNNSLFAKFFGGVQLFTAR-GGYLLEGRVDQI---AVGFRMFQSDR 541
T7_TFP   ---MGGKMLDAYLRDSFVAKSKANTQVMSGS-ACGGVSVTVSQDL--RFRNIWIKCAN 501
T3_TFP   ---MGRKMLDAYLMDTYKKTMAHTQVMAAA-SDSVMGGGSQ-----TDTLHRTCD 497
K1F_TSP  HKSPKRTDLGLIPS-----VTEVHSFATIDNNGFAMQYHQGVAPREVGLFYFPAF 560

TFPgp17  R----IKEDIKVVRSADDMNLIRSYIPVSYKYKQDASYTDNRGRTNTEIGKSRAGFIT 596
T7_TFP   N---SNMFFRTGPDG---T-----YFTASDGGNLRPQIHS-----NGLGFFGN 537
T3_TFP   A--TYGIRPFTTIGTSELVLIV-----STSPQPRRMLKFIHS-----NGRVFQ 541
K1F_TSP  NSFSNYVRRQIPSEYEPQASEPCIKYDGL-----YLITROT---RCDLGGSSLHR 609

TFPgp17  Q-CLIRINPEAVDVMSDGGQSPFNQIIQGLMLLVGNLDAARIQLEKDKT----- 645
T7_TFP   I-ADSRVFNALMIVENE----- 553
T3_TFP   I-ADRAATPTAIAVEDV----- 557
K1F_TSP  SRDIOQTKEKSLR-PPSDVNHNTLDFAVVCEDLIMFGSERAKNEWEAGAFDDRYKASTPR- 667

```

Multiple sequence alignment of TFPgp17 and L-shaped TFP from phage T5 (T5\_TFP, UniProt code: P13390), side TFP from prophage K12 (K12\_TFP, UniProt code: P76072) and TFP from phage lambda (L\_TFP, UniProt code: P03764). Identities between TFPgp17 and all other selected proteins are shown in dark blue; those between TFPgp17, T5\_TFP and K12\_TFP are shown in turquoise; those between TFPgp17, K12\_TFP and L\_TFP are shown in red; those between TFPgp17, T5\_TFP and L\_TFP are shown in grey; those between TFPgp17 and T5\_TFP are shown in pink; those between TFPgp17 and K12\_TFP are shown in orange and those between TFPgp17 and L\_TFP are shown in purple

|         |                                                                 |     |
|---------|-----------------------------------------------------------------|-----|
| TFPgp17 | MATTIKTVMYPLDGSSTDFNIPFEYLAKF---VRVTLIGVDRK-EL-ILNQCYRFATK      | 55  |
| T5_TFP  | -----MAI---TK                                                   | 5   |
| K12_TFP | MAVKISGVVLDGDT-GKFPVQ-NCTIQLKAKRNSTVVVNTLASENPDZAGRYSDVEYGGY    | 58  |
| L_TFP   | MAVKISGVVLDGDT-GKFPVQ-NCTIQLKAKRNSTVVVNTVQSENPDZAGRYSDVEYGGY    | 58  |
| TFPgp17 | TTISTTRALGFADGYY--LIEIRRFPSATDRLVDFT---DGSILRAYDLNIQQVQLHV      | 109 |
| T5_TFP  | -IIL-----QQMVTMDQNSITAKYFKITVVLKNSIS---                         | 36  |
| K12_TFP | SVILLVEGFFPSHAGTITVYEDSQPOTLNDFLGAMTEDDARPEALRFRLELMVEEVARNAS   | 118 |
| L_TFP   | SVILLQVDFGFFPSHAGTITVYEDSQPOTLNDFLCAMTEDDARPEALRFRLELMVEEVARNAS | 118 |
| TFPgp17 | AEEARDLADTIGVNDGNLDAFGRRIVNVAQAQVGDGAI--NLGQIQIRIND-----        | 159 |
| T5_TFP  | -----SITA-----ADVTSALSSKA---SGFAAKQS-----                       | 60  |
| K12_TFP | AVA--QNTAAAKSASDASTSAPE-AATHAADADARAASSTAGQAASASASASAGT         | 175 |
| L_TFP   | VVA--QSTADAKKSAGDASASAAQ-VAALVTDATDARAASSTAGQAASASASASAGT       | 175 |
| TFPgp17 | -----SALNSANRA--KQEAADRA                                        | 175 |
| T5_TFP  | ---EINAKQSELNAKDSENE---AETISATSSQQSATQASASATASANAKAA            | 106 |
| K12_TFP | ASTKATEAKSAAAASSSKSAATSAAGAATSETNASASLQSAATASATA--TTKASEA       | 232 |
| L_TFP   | ASAKATEAKSAAAASSSKSAATSAAGAATSETNAAASQQSAATASATA--ATKASEA       | 232 |
| TFPgp17 | TARANDANANASAS---SASSSSGSAELAKRMTSDTVVESDLESSRTYALHSHLYRN       | 232 |
| T5_TFP  | KTSETNANONKRAHSETNAASSASSAS-----S-----FAT                       | 139 |
| K12_TFP | ATSARDAAAASKEAASSETNASSASSASAA-----S-----SAT                    | 265 |
| L_TFP   | ATSARDAAVAASKEAASSETNASSASSAGRAA-----S-----SAT                  | 265 |
| TFPgp17 | ETKDSADRAAVSETNAKASEG-----                                      | 253 |
| T5_TFP  | AAENSARAARKTSETNAGNSAQAADASKTAAANSATAAK-----TSETNAK-----        | 184 |
| K12_TFP | AAENSARAARKTSETNARSSEAAAGQASAAAAGSKTAAASASASAASSTAGQASASATAAGK  | 325 |
| L_TFP   | AAENSARAARKTSETNARSSEAAARSASAAAADAKTAAA-----                    | 303 |
| TFPgp17 | -----GAANSAAAKVSETNAKASEERAITEASKLGDG---                        | 286 |
| T5_TFP  | -----KSETAARKTSETNAKASEERAITEASKLGDG---                         | 217 |
| K12_TFP | SAESAASSASTATTKAGEATEQASAAARSAAAKTSETNAKASETSAESKTAASASSS       | 385 |
| L_TFP   | -----                                                           | 303 |
| TFPgp17 | -----NDFAAAIESVTGNDV--KMGAVSSPGNITGGGLV-STGAASIQKCALV           | 332 |
| T5_TFP  | VT-----QYDW---FVGTNNNSVYVIAKLTDF-GAVS-CHLTL-----MITNGNY         | 259 |
| K12_TFP | AASSASSASASAKDETRQAASAKSATTASTKATEAAGSATAAQSKSTAESAAATRAETA     | 445 |
| L_TFP   | -----GSASTASTKATEAAGSAVSASQSKSAARAAAPRONS                       | 340 |
| TFPgp17 | GEDLIVGRDITAKQMYSQRNIAVAVTYAQGGIEQTLATINYNKLYRLHINSNQRVGG       | 392 |
| T5_TFP  | GSS---YGNL---DF---VEISARLNDAROVTS---ENIT-IFLSVRRLSF----         | 299 |
| K12_TFP | AKR--AEDI-----ASVALEDAS-TTK---KGVV-QLSSATNSTSETLAAT             | 485 |
| L_TFP   | AKR--AEDI-----ASVALEDAD-TTR---KGVV-QLSSATNSTSETLAAT             | 380 |
| TFPgp17 | RQGLHIGH-NESG-----SGESNFTNNG---AGSGGFVFRVNAENSV                 | 432 |
| T5_TFP  | ---NLANDNQLRYGLV--EGDGYFEVWCYQRAI IKETRVAVLAQTGR--TELYIFGQV     | 351 |
| K12_TFP | PKAVKSAVDNAEKRLQKQDQNGADIPOKGCFLNN-INAVSKTEFADNR-GRYVRYNAPAGA   | 544 |
| L_TFP   | PKAVKVVDETRKAPLDSFALT-----                                      | 403 |
| TFPgp17 | ETRV---DITGGVIY--ANHLQVRSGARIEG---NNNIVQQNLYAG-----MGST         | 476 |
| T5_TFP  | -SQDTQ-----PSGFIESLAARIYDQWKP--KADLGLNAMLVGFGLGGNGLYS           | 401 |
| K12_TFP | TS-KYYPVVVRSAGSVSELSARVITATSTAGDFMNCCEPFGFMPGWN-----            | 595 |
| L_TFP   | -----GTPAPTALRGT-----                                           | 415 |
| TFPgp17 | MFEQGNLITGGIWAQGNLMSGLANNSLFAKPP-GVQLFTA-----FGGYILEGRVD        | 528 |
| T5_TFP  | SVQSNVDLILNKLKNGQYWRRAAESGARVDINDHSGGFYSBGGDTHAAINVQNTGIV-      | 460 |
| K12_TFP | -----TDRGRYAYGMFWQYQNNERAIMS-----MSNKGDDL--SVFTVDCAA-           | 638 |
| L_TFP   | -----NNT-----QI--AN-----TA-                                     | 424 |
| TFPgp17 | GTAVGFRWFQSDRRKEDIKVVRSADDDMLNIR---SYIFVSYKYKDAYTDRNRRTN        | 583 |
| T5_TFP  | -----KVLATTORNL-----ASDIVYANTLY--GTANKPS---KSD                  | 491 |
| K12_TFP | -----F-----PVFAFIEDGLSISAPGADLVVNDTTYFGATNPATECIAAD             | 680 |
| L_TFP   | -----F-----VLAATAVIDA-SFDALNTINELAAALGN-----                    | 453 |
| TFPgp17 | TIEGKRSRACFI-----TQ-----DLIRLMPFAVDVMSDGMQ-SFD                  | 618 |
| T5_TFP  | VGLGNVNDQAQVQAGDVMSGDLDIRKETPSIRLKSSTQGNALMFPDNGGGERGVINSP      | 551 |
| K12_TFP | VILDFFGRGFYESHSLIVNDNLSCKLFATDEIVARGGN---QIRMIGGEYGALWRND       | 736 |
| L_TFP   | -----DPDFATMTNALAGK---QFK-----N-                                | 472 |
| TFPgp17 | FWQII-----GCLMLLV-----KNLARIQELEKQK-----                        | 645 |
| T5_TFP  | NNGSLGEHIRAKTSDGTSTGDFIVRHDRIEAKDAKISYKISSARFSDNDNTAATN         | 611 |
| K12_TFP | GAKTYLLL---TNQGVYGHNTLR-----FFALNATGELVIGTKLS---                | 776 |
| L_TFP   | ---A-TL---T-----                                                | 476 |
